# Supplementary material for: Targeted Disruption of NeuroD, a Proneural Basic Helix-Loop-Helix Factor, Impairs Distal Lung Formation and Neuroendocrine Morphology in the Neonatal Lung
Source: PubMed Central journal article supplement — J Biol Chem. 2008 Jul 25;283(30):21160–9. doi: 10.1074/jbc.M708692200 (PMC2475704; doi:10.1074/jbc.m708692200), 2008-07-25
Supplement: M708692200_1.pdf [file M708692200_1.pdf]

Supplemental Figures

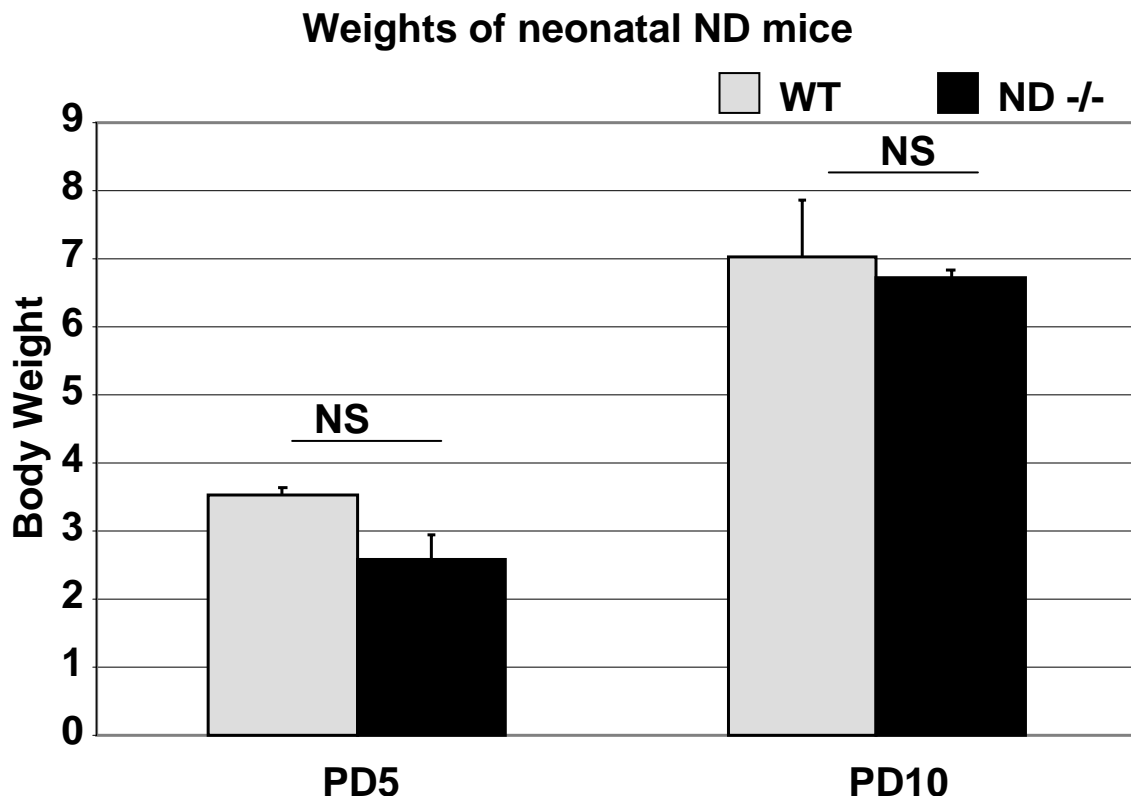

Supplementary Figure S1. Neonatal wild-type and NeuroD-deficient mice have no difference in body weight. Five to ten mice of each noted genotype and age were weighed before lung harvest. There is no significant difference in the weights of the mutant mice at the two perinatal time points. PD5-Postnatal day 5, PD10-Postnatal day 10, NS-No statistical difference.

## Role of NeuroD in airway and airspace morphogenesis

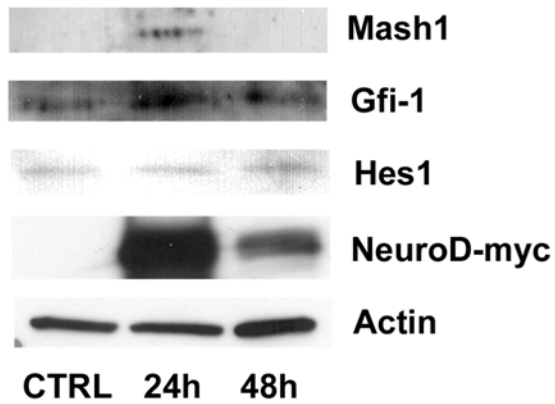

Supplementary Figure S2. NeuroD overexpression alters the expression of known modulators of neuroendocrine phenotype. Representative immunoblot showing that whereas NeuroD overexpression does not affect hes1 expression, it does induce Mash1 and Gfi-1, known mediators of pulmonary neuroendocrine morphology. MLE12 lysates were harvested 24hours and 48hours after transfection with NeuroDmyc. Control lysates (CTRL) were harvested from cells transfected 48hours prior with a control vector.
